# Supplementary material for: Role of Endogenous Salicylic Acid as a Hormonal Intermediate in the Bacterial Endophyte Bacillus subtilis-Induced Protection of Wheat Genotypes Contrasting in Drought Susceptibility under Dehydration
Source: MDPI journal article supplement (doi:10.3390/plants11233365), 2022-12-03
Supplement: s1 [file s1]

Supplementary Figure S1.

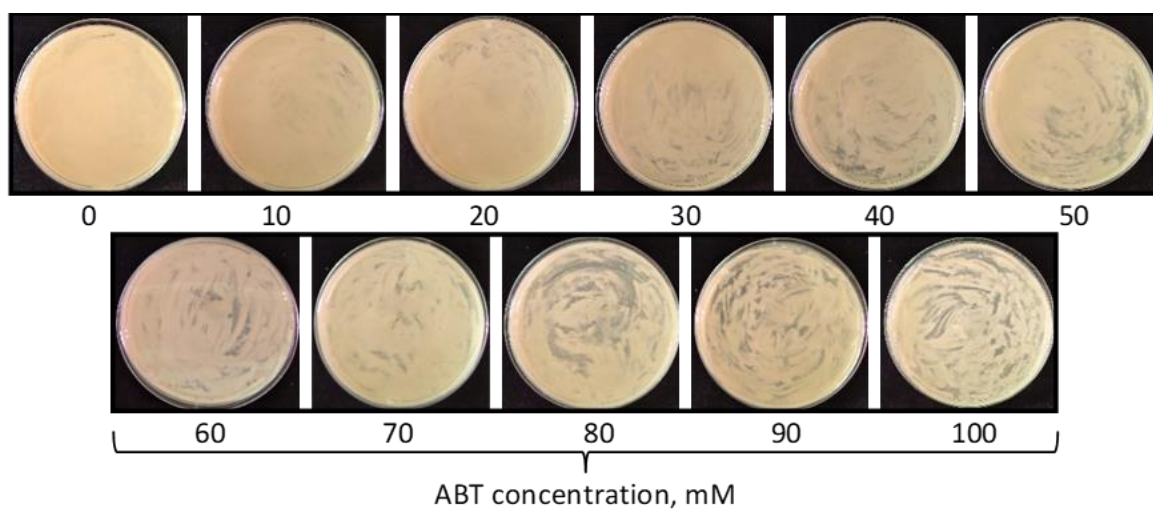

**Figure S1.** Influence of salicylic acid (SA) biosynthesis inhibitor 1-aminobenzotriazole (ABT) in range of concentrations (0-100 mM) on the growth of bacteria *B. subtilis* 10-4 in Petri dishes with LB nutrient medium.
